# Supplementary material for: Biomarkers of Checkpoint Inhibitor Induced Immune-Related Adverse Events—A Comprehensive Review
Source: PubMed Central journal article supplement (PMC7905347; doi:10.3389/fonc.2020.585311), 2021-02-11
Supplement: Table_1.pdf [file Table_1.pdf]

Supplementary data

## Biomarkers of checkpoint inhibitor induced immune-related adverse events – a comprehensive review

Josefien W. Hommes, Rik J. Verheijden, Karijn P.M. Suijkerbuijk, Dörte Hamann

Frontiers in Oncology 2020





|                | Baseline             |                          |                          |                          |                           |                           |                         | EDT* | ΔirAE-baseline**     |                          |                          |                         |
|----------------|----------------------|--------------------------|--------------------------|--------------------------|---------------------------|---------------------------|-------------------------|------|----------------------|--------------------------|--------------------------|-------------------------|
|                | Lim et al. 2019 (41) | S. Khan et al. 2019 (42) | Oyanagi et al. 2019 (43) | Tarhini et al. 2015 (44) | Kurimoto et al. 2020 (45) | Valpione et al. 2018 (37) | Chaput et al. 2017 (28) |      | Lim et al. 2019 (41) | S. Khan et al. 2019 (42) | Oyanagi et al. 2019 (43) | Tanaka et al. 2017 (38) |
| sCD40L         | Grey                 |                          | Grey                     |                          |                           |                           |                         | Grey |                      | Grey                     |                          |                         |
| sCD163         |                      |                          |                          |                          |                           |                           |                         |      |                      |                          |                          | Green                   |
| SCF            | Grey                 |                          |                          |                          |                           |                           |                         | Grey |                      |                          |                          |                         |
| SCYB16/ CXCL16 |                      | Grey                     |                          |                          |                           |                           |                         |      | Grey                 |                          |                          |                         |
| SDF-1/ CXCL12  | Grey                 | Grey                     |                          |                          |                           |                           |                         | Grey | Grey                 |                          |                          |                         |
| TARC/ CCL17    | Grey                 |                          |                          |                          |                           |                           |                         | Grey |                      |                          |                          |                         |
| TGF-α          | Grey                 |                          |                          |                          |                           |                           |                         | Grey |                      | Grey                     |                          |                         |
| TGF-β1         |                      |                          | Grey                     | Grey                     |                           |                           |                         |      |                      | Grey                     |                          |                         |
| TGF-β2         |                      |                          | Grey                     |                          |                           |                           |                         |      |                      | Grey                     |                          |                         |
| TGF-β3         |                      |                          |                          |                          |                           |                           |                         |      |                      | Grey                     |                          |                         |
| TNF-α          | Grey                 |                          | Grey                     | Grey                     | Grey                      |                           | Grey                    | Grey |                      | Grey                     | Grey                     |                         |
| TNF-β/LT-α     | Grey                 |                          | Grey                     |                          |                           |                           |                         | Grey |                      | Grey                     |                          |                         |
| TPO            | Grey                 |                          |                          |                          |                           |                           |                         | Grey |                      |                          |                          |                         |
| TRAIL          | Grey                 |                          |                          |                          |                           |                           |                         | Grey |                      |                          |                          |                         |
| TSLP           | Grey                 |                          |                          |                          |                           |                           |                         | Grey |                      |                          |                          |                         |
| VEGF           | Grey                 |                          | Grey                     | Grey                     |                           | Grey                      |                         | Grey |                      | Grey                     |                          |                         |
| VEGF-A         |                      |                          | Grey                     |                          |                           |                           |                         |      |                      | Grey                     |                          |                         |
| VEGF-C         |                      |                          | Grey                     |                          |                           |                           |                         |      |                      | Grey                     |                          |                         |
| VEGF-D         |                      |                          | Grey                     |                          |                           |                           |                         |      |                      | Grey                     |                          |                         |

\*EDT= early during treatment=1-6 weeks after start of therapy

\*\* ΔirAE-baseline= increase/decrease at onset of irAE compared to baseline

† associated with colitis particularly

‡ associated with thyroiditis particularly

¶ associated with psoriasis particularly

### Legend

Grey = parameter was analysed but not significantly correlated with irAE

Green = higher/increased in patients with irAE

Orange = lower/decreased in patients with irAE

Yellow = prediction model of multiple parameters
